# Supplementary material for: Combining a Universal Telomerase Based Cancer Vaccine With Ipilimumab in Patients With Metastatic Melanoma - Five-Year Follow Up of a Phase I/IIa Trial
Source: PubMed Central journal article supplement (PMC8147687; doi:10.3389/fimmu.2021.663865), 2021-05-11
Supplement: Image_1.pdf [file Image_1.pdf]

**Supplementary figure 1**

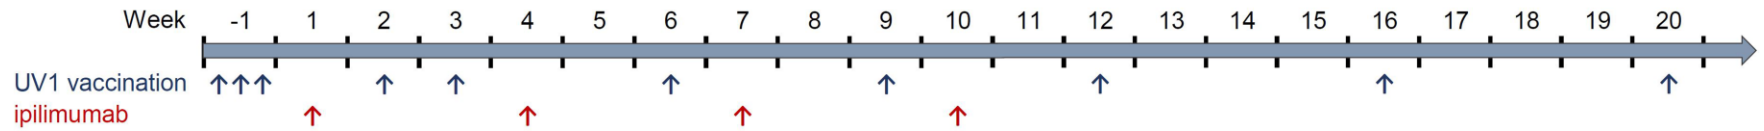

UV1 vaccination and ipilimumab treatment schedule. UV1 and GM-CSF are administered up to 10 times and ipilimumab as labeled
