# Supplementary material for: Combining a Universal Telomerase Based Cancer Vaccine With Ipilimumab in Patients With Metastatic Melanoma - Five-Year Follow Up of a Phase I/IIa Trial
Source: PubMed Central journal article supplement (PMC8147687; doi:10.3389/fimmu.2021.663865), 2021-05-11
Supplement: Image_3.pdf [file Image_3.pdf]

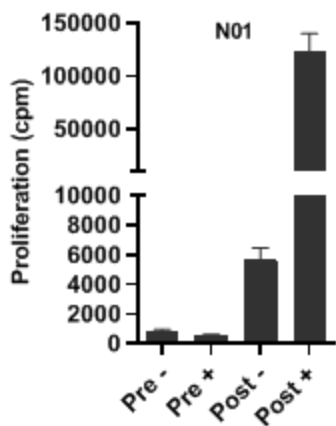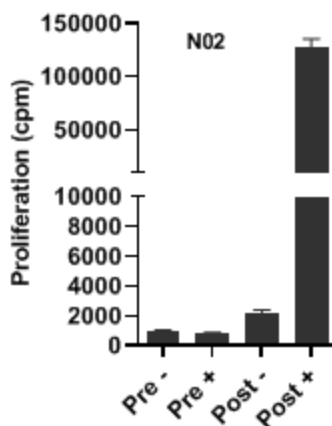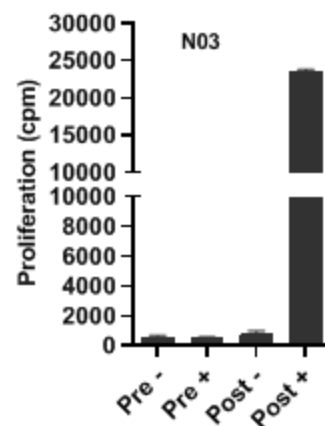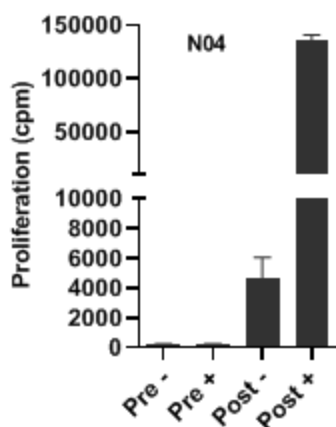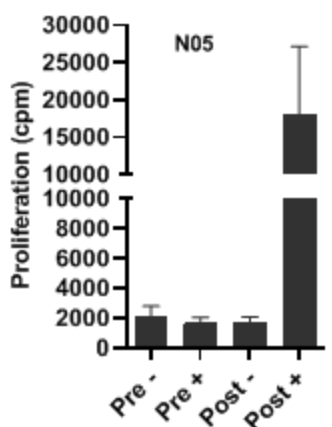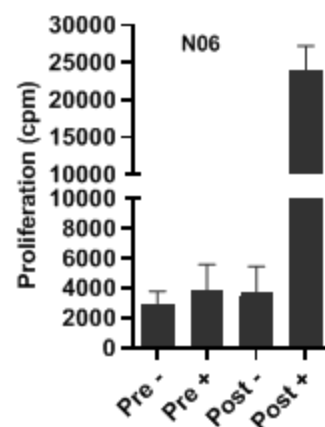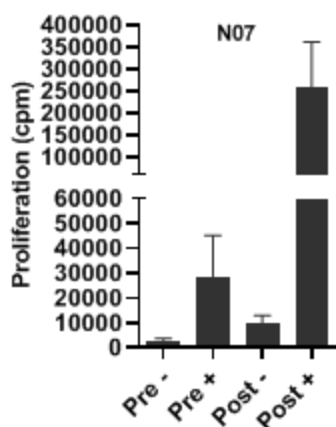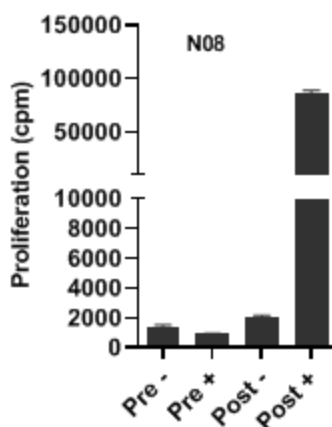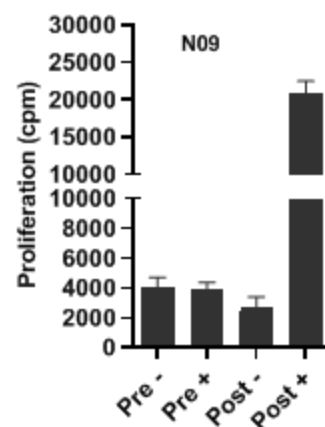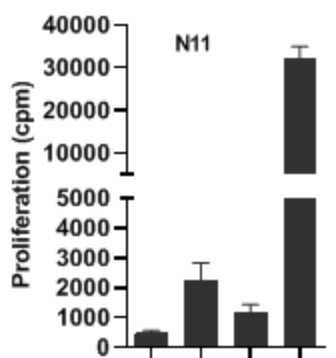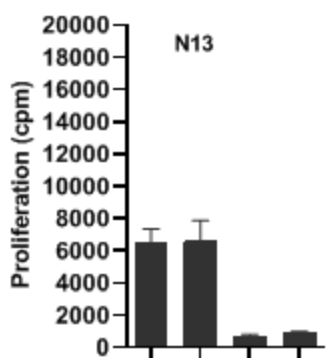

**Supplementary Figure S3. Pre- and post-vaccination UV1-specific T-cell responses.** T-cell proliferation against UV1 peptides in pre- and post-vaccination blood samples. The graph shows the pre-vaccination and the strongest post-vaccination T-cell responses detected for each patient. Proliferation was measured in response to non-loaded (-) and peptide-loaded (+) PBMC by  $^3\text{H}$ -thymidine incorporation.
