# Supplementary material for: Combining a Universal Telomerase Based Cancer Vaccine With Ipilimumab in Patients With Metastatic Melanoma - Five-Year Follow Up of a Phase I/IIa Trial
Source: PubMed Central journal article supplement (PMC8147687; doi:10.3389/fimmu.2021.663865), 2021-05-11
Supplement: Table_1.pdf [file Table_1.pdf]

**Supplementary Table 1.** Treatment overview (*N*=12)

| Patient | Total number of vaccines | Total number of ipilimumab infusions |
|---------|--------------------------|--------------------------------------|
| N01     | 9 <sup>a</sup>           | 4                                    |
| N02     | 9 <sup>b</sup>           | 4                                    |
| N03     | 9 <sup>b</sup>           | 4                                    |
| N04     | 7 <sup>c</sup>           | 3 <sup>a</sup>                       |
| N05     | 6 <sup>b</sup>           | 3 <sup>b</sup>                       |
| N06     | 6 <sup>b</sup>           | 2 <sup>b</sup>                       |
| N07     | 5 <sup>c</sup>           | 4                                    |
| N08     | 3 <sup>c</sup>           | 3 <sup>a</sup>                       |
| N09     | 3 <sup>c</sup>           | 4                                    |
| N11     | 3 <sup>c</sup>           | 3 <sup>a</sup>                       |
| N13     | 3 <sup>c</sup>           | 3 <sup>b</sup>                       |
| N14     | 3 <sup>c</sup>           | 1 <sup>d</sup>                       |

Cause of treatment cessation: <sup>a</sup>adverse event, <sup>b</sup>disease progression, <sup>c</sup>regulatory requirements, <sup>d</sup>physician's decision
