# Supplementary material for: Combining a Universal Telomerase Based Cancer Vaccine With Ipilimumab in Patients With Metastatic Melanoma - Five-Year Follow Up of a Phase I/IIa Trial
Source: PubMed Central journal article supplement (PMC8147687; doi:10.3389/fimmu.2021.663865), 2021-05-11
Supplement: Table_2.pdf [file Table_2.pdf]

**Supplementary table 2. Patient HLA typing in relation to UV1 peptides immune responses**

| HLA-A class I |        | HLA-A class II |        |          |        |          |        |         |         | Immune response |   |   | UV1 mix |
|---------------|--------|----------------|--------|----------|--------|----------|--------|---------|---------|-----------------|---|---|---------|
| HLA-A         | HLA-B  | HLA-DRB1       |        | HLA-DQB1 |        | HLA-DPB1 |        | p719-20 | p728    | p725            |   |   |         |
| *01:01        | *03:01 | *07:02         | *40:01 | *04:04   | *15:01 | *03:02   | *06:02 | *03:01P | *04:01P | +               | - | - | +       |
| *23:01        | *24:02 | *35:01         | *44:03 | *01:03   | *07:01 | *02:02   | *05:01 | *02:01  | -       | +               | - | + | +       |
| *03:01        | -      | *07:02         | *15:01 | *04:01   | *07:01 | *02:02   | *03:02 | *01:01  | *04:01  | +               | - | - | +       |
| *03:01        | *25:01 | *08:01         | *18:01 | *03:01   | *15:01 | *02:01   | *06:02 | *04:01  | -       | +               | + | + | +       |
| *02:01        | *03:01 | *44:02         | *51:01 | *08:03   | *15:01 | *03:01   | *06:02 | *02:01  | *04:01  | +               | - | - | +       |
| *01:01        | *02:01 | *40:01         | *57:01 | *07:01   | *13:02 | *03:03   | *06:04 | *04:02  | -       | +               | - | - | +       |
| *02:01        | *03:01 | *07:02         | *35:01 | *07:01   | *08:01 | *03:03   | *04:02 | *04:01  | -       | +               | + | + | +       |
| *02:01        | *24:02 | *15:01         | *44:02 | *01:01   | *13:01 | *05:01   | *06:03 | *03:01P | *04:01P | +               | + | + | +       |
| *02:01        | *03:01 | *07:02         | -      | *15:01   | -      | *06:02   | -      | *04:01  | -       | +               | - | - | +       |
| *02:01        | *30:01 | *13:02         | *44:02 | *07:01   | *11:01 | *02:02   | *03:01 | *02:01  | *17:01  | +               | - | - | +       |

Patient HLA typing in immune responders ( $N=10$ ). HLA typing was conducted using Tier 1 Typing by PCR-sequence specific oligonucleotides (PCR-SSOP) to resolve major allele groups to 4 digits, with some degeneracy. Immune responses were observed across HLA subtypes.
